# Supplementary material for: Aspirin Alleviates Particulate Matter Induced Asymptomatic Orchitis of Mice via Suppression of cGAS-STING Signaling
Source: PubMed Central journal article supplement (PMC8673441; doi:10.3389/fimmu.2021.734546), 2021-12-01
Supplement: DataSheet_1.pdf [file DataSheet_1.pdf]

**Supplementary Table 1.** Primers used in this study.

| Gene          | 5' primer                 | 3' primer                 |
|---------------|---------------------------|---------------------------|
| <i>Ifnb</i>   | GCCTTTGCCATCCAAGAGATGC    | ACACTGTCTGCTGGTGGAGTTC    |
| <i>Cxcl9</i>  | GAGGCACGATCCACTACAAA      | AGTCCGGATCTAGGCAGGTT      |
| <i>Tnfa</i>   | ATGAGAGGGAGGCCATTTG       | CAGCCTCTTCTCATTCTGC       |
| <i>Mcp1</i>   | CTTCTGGGCTGCTGTTCA        | CCAGCCTACTCATTGGGATCA     |
| <i>Il6</i>    | TGGTACTCCAGAAGACCAGAGG    | AACGATGATGCACTTGCAGA      |
| <i>Cxcl1</i>  | ATGGCTGGGATTCACCTC        | CTTCAGGGTCAAGGCAAG        |
| <i>Cxcl10</i> | GCAGGTACAGCGTACGGTTC      | CAGCAGAGGAACCTCCAGTC      |
| <i>Hprt</i>   | CTCATGGACTGATTATGGACAGGAC | GCAGGTCAGCAAAGAACTTATAGCC |

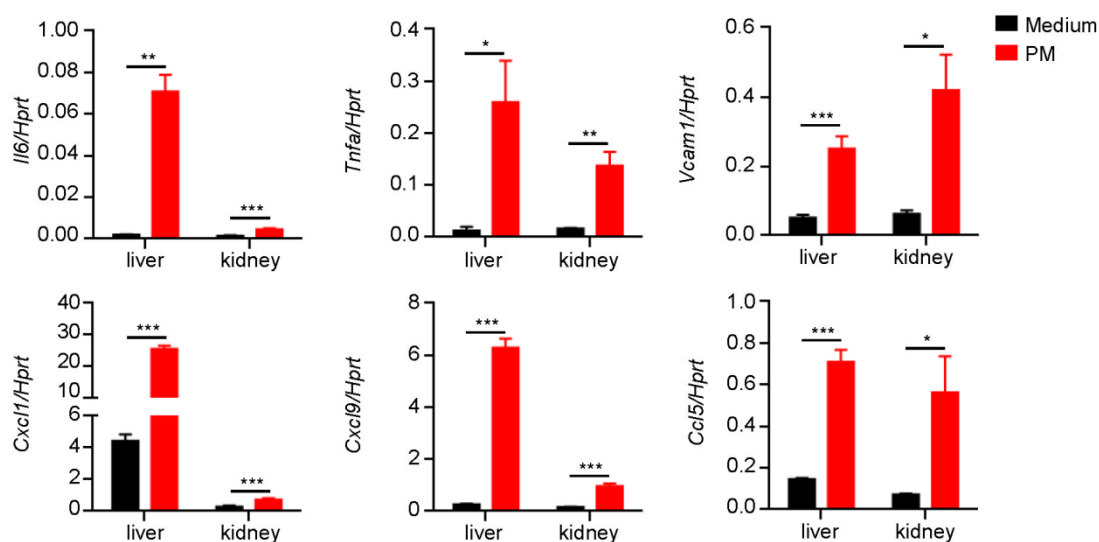

**Supplementary Figure 1. Exposure of PM causes inflammation in liver and kidney of mice.** Expression analysis of *Il6*, *Tnfa*, *Vcam1*, *Cxcl1*, *Cxcl9* and *Ccl5* in livers and kidneys after 7-days of PM exposure. Data represent two independent experiments. Data are presented as mean  $\pm$  SEM. \*,  $P < 0.05$ ; \*\*,  $P < 0.01$ ; \*\*\*,  $P < 0.001$ .

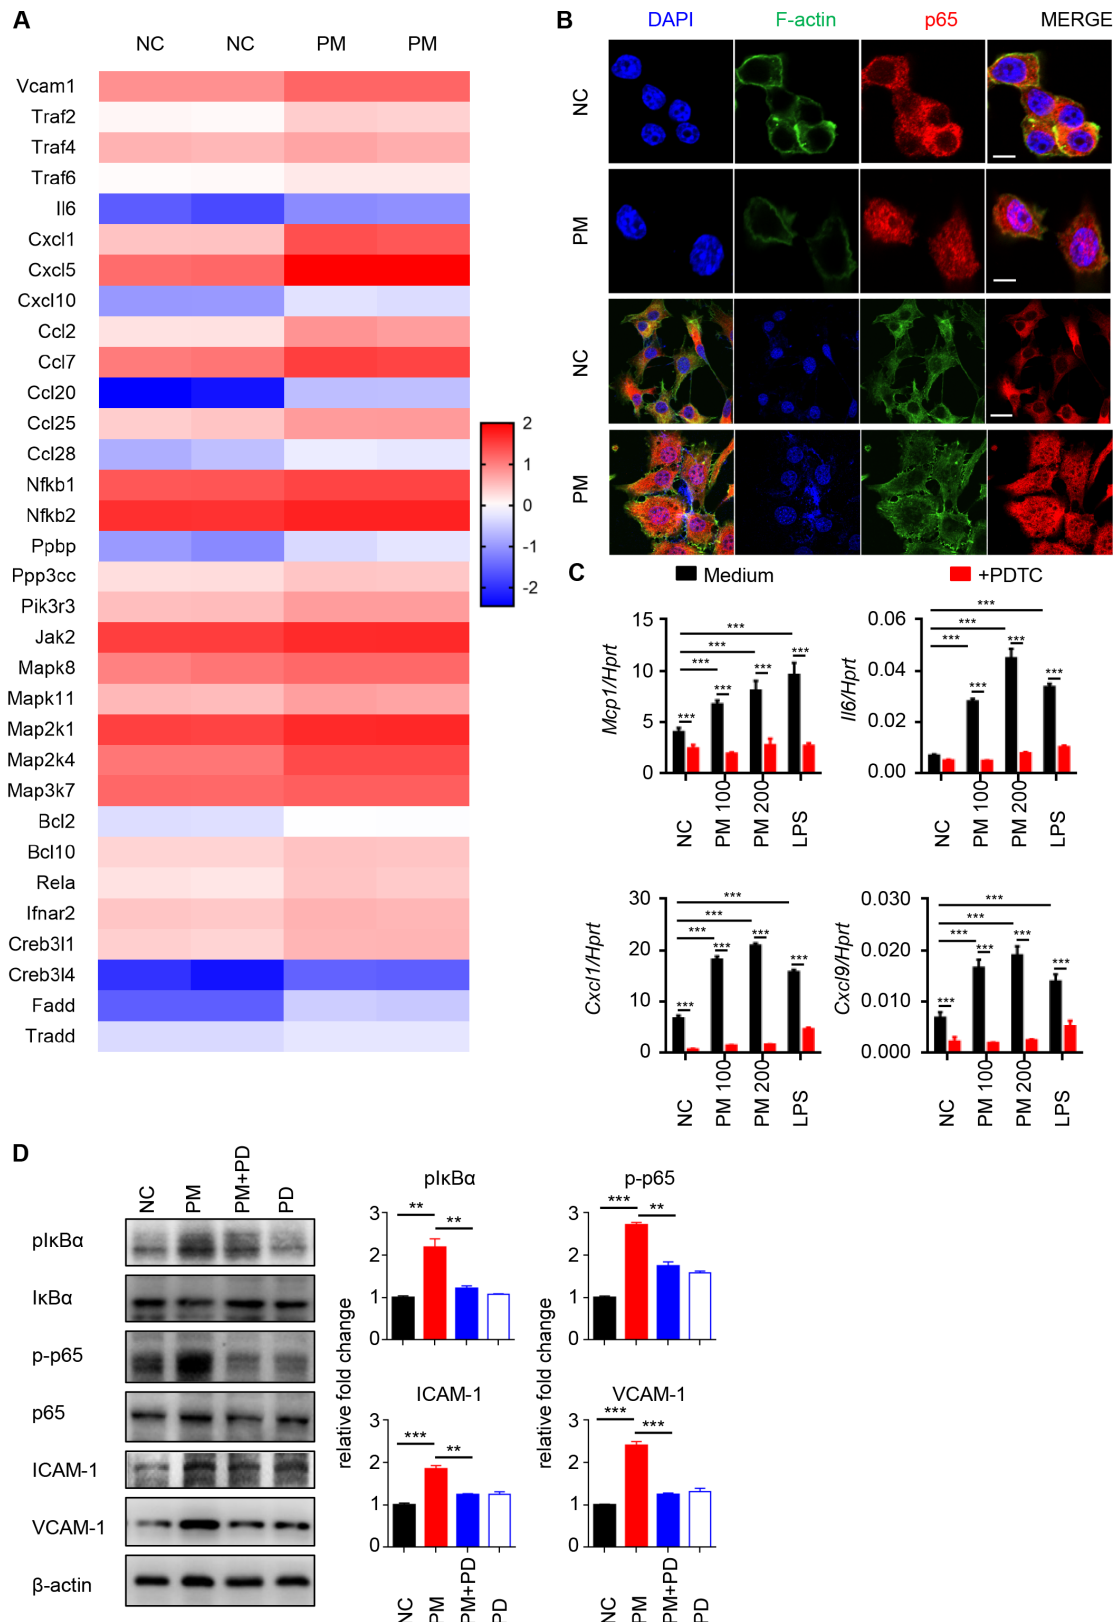

**Supplementary Figure 2. PM activates NF- $\kappa$ B signaling in mouse Leydig cells. (A)**

Heatmap showing the expression of genes comprised in NF- $\kappa$ B signaling after 200

$\mu\text{g/ml}$  PM administration for 24 hours. **(B)** Confocal microscopy analysis of p65 in TM3 cells after 200  $\mu\text{g/ml}$  PM administration for 12 hours. Scale bars: 50  $\mu\text{m}$  in yellow and 20  $\mu\text{m}$  in white. **(C)** Expression analysis of *Mcp1*, *Il6*, *Cxcl1* and *Cxcl9* in TM3 cells after PM administration for 12 hours (NC, PBS; PM 100, PM at 100  $\mu\text{g/ml}$ ; PM 200, PM at 200  $\mu\text{g/ml}$ ; LPS, 1  $\mu\text{g/ml}$ ). **(D)** Immunoblot analysis of phosphorylation of  $\text{I}\kappa\text{B}\alpha$  and p65 and protein level of  $\text{I}\kappa\text{B}\alpha$ , VCAM-1, ICAM-1 and p65 in mouse testis after 3 day's of exposure.  $\beta$ -actin was used as the loading control. The intensity of signaling was quantified. Data represent three independent experiments in **B-C**. Data are presented as mean  $\pm$  SEM. \*\*,  $P < 0.01$ ; \*\*\*,  $P < 0.001$ .

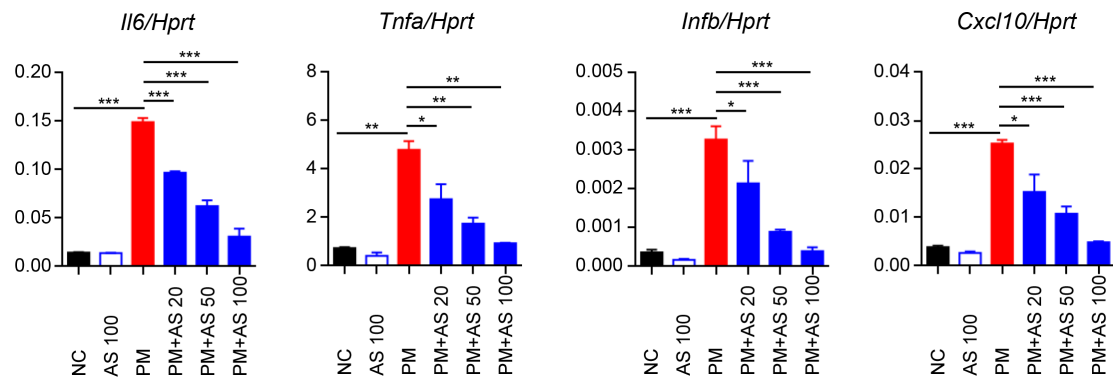

**Supplementary Figure 3. aspirin pre-treatment reduces PM exposure induced inflammation (related to Figure 3).** Expression analysis of *Il6*, *Tnfa*, *Ifnb*, and *Cxcl10* in the testis TM3 cells post 200  $\mu\text{g/ml}$  PM administration for 12 hours with or without 20, 50 or 100  $\mu\text{g/ml}$  aspirin. Data are presented as mean  $\pm$  SEM. \*,  $P < 0.05$ ; \*\*,  $P < 0.01$ ; \*\*\*,  $P < 0.001$ .

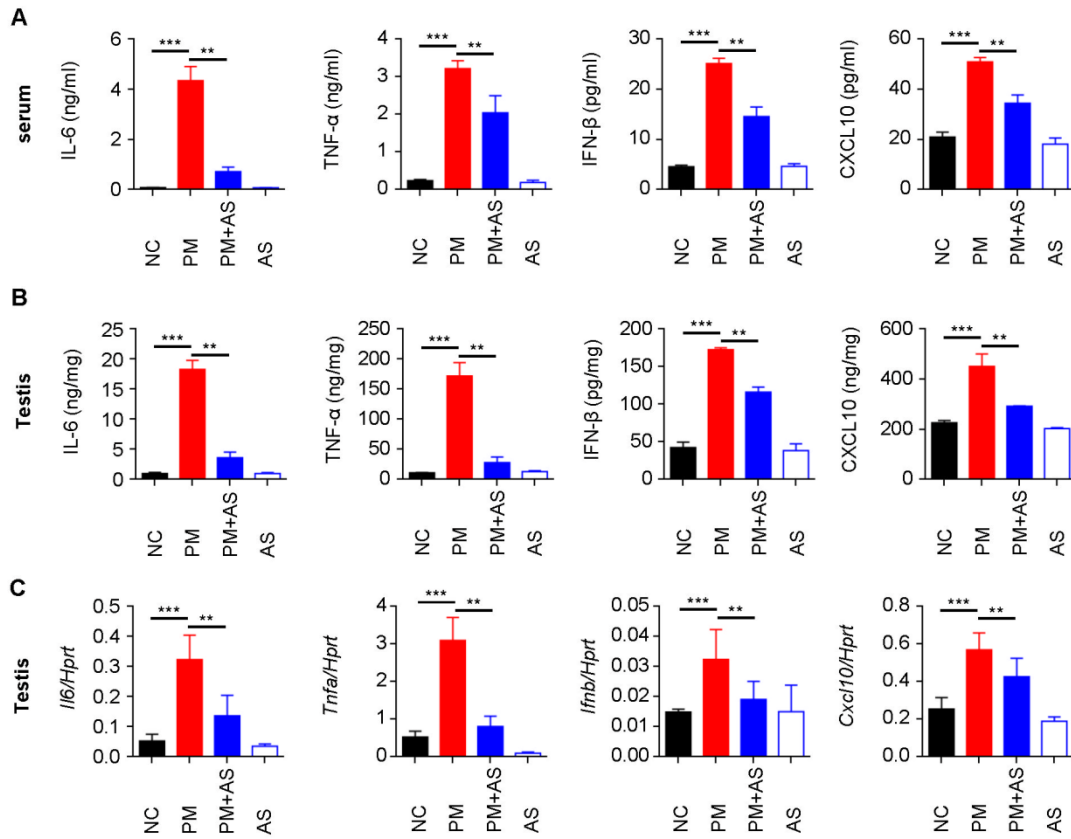

**Supplementary Figure 4. Aspirin pre-treatment alleviates PM-induced systemic and testicular inflammation in mice.** (A) Production of IL-6, TNF- $\alpha$ , IFN- $\beta$  and CXCL10 in the serum of mice after 7-days of PM exposure with or without intragastrically administration of aspirin. (NC, PBS; PM, 400  $\mu$ g/kg PM; AS, aspirin 20 mg/kg only; PM+AS, 400  $\mu$ g/kg PM + 20 mg/kg aspirin). (B) Production of IL-6, TNF- $\alpha$ , IFN- $\beta$  and CXCL10 in the testes of mice after 7-days of PM exposure with or without intragastrically administration of aspirin. (C) Expression analysis of *Il6*, *Tnfa*, *Ifnb*, and *Cxcl10* in the testes of mice after 7-days of PM exposure with or without intragastrically administration of aspirin. Data are presented as mean  $\pm$  SEM. \*\*,  $P < 0.01$ ; \*\*\*,  $P < 0.001$ .

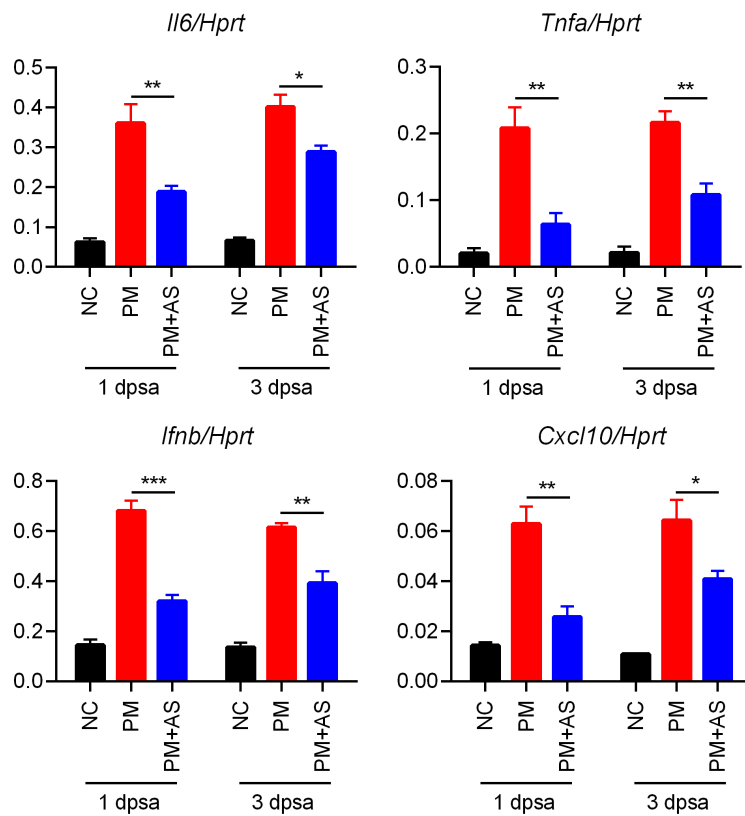

**Supplementary Figure 5. The retained protective effect of aspirin.** Expression analysis of *Il6*, *Tnfa*, *Ifnb*, and *Cxcl10* in the testes of mice after 200  $\mu\text{g/ml}$  PM administration at indicated time. Mice were intragastrically administration of 20 mg/kg aspirin for 5 days before PM exposure. dpsa, days post stopping aspirin administration. \*,  $P < 0.05$ ; \*\*,  $P < 0.01$ ; \*\*\*,  $P < 0.001$ .

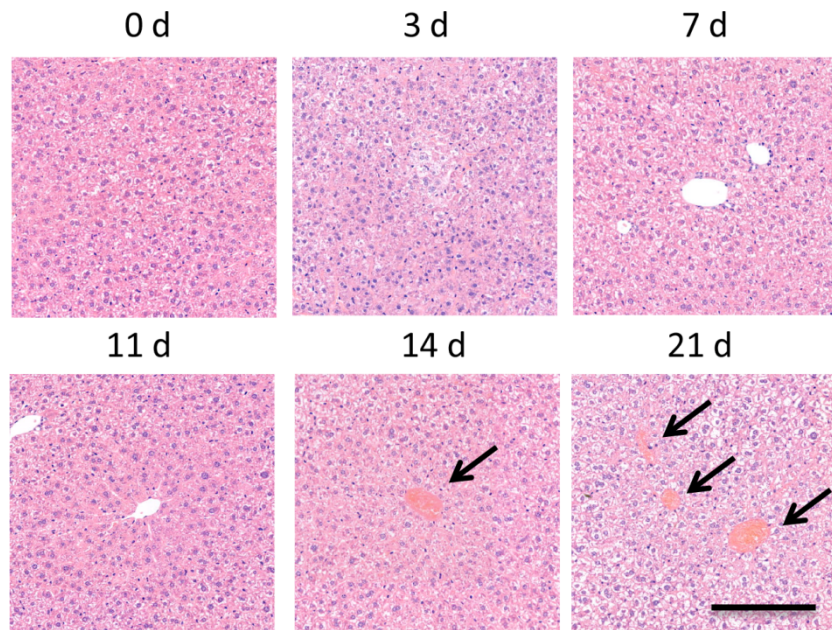

**Supplementary Figure 6. Preliminary evaluation of hemorrhagic side effect of aspirin treated mice.** H&E staining evaluation of the hemorrhagic spot (black arrow) in the livers of mice taking 20 mg/kg of aspirin for indicated time.
